# Supplementary material for: Light-triggered carbon monoxide delivery with Al-MCM-41-based nanoparticles bearing a designed manganese carbonyl complex
Source: Royal Society of Chemistry journal article supplement (doi:10.1039/c3tb21309a), 2014-01-01
Supplement: c3tb21309a.pdf [file c3tb21309a.pdf]

## Supporting Information

for

### **Light-triggered Carbon Monoxide Delivery with Al-MCM-41-based Nanoparticles Bearing a Designed Manganese Carbonyl Complex**

**Margarita A. Gonzales,<sup>a</sup> Howard Han,<sup>a</sup> Amie Moyes,<sup>b</sup> Achilles Radinos,<sup>b</sup> Adrian J. Hobbs,<sup>b</sup> Neil Coombs,<sup>c</sup> Scott R. J. Oliver<sup>a\*</sup> and Pradip K. Mascharak<sup>a\*</sup>**

*Contribution from the (a) Department of Chemistry and Biochemistry, University of California, Santa Cruz, CA 95064, USA, (b) The London School of Medicine, Queen Mary University of London, London EC1M 6BQ, (c) Center for Nanostructure Imaging, University of Toronto, Toronto, Ontario M5S 3H6, Canada.*

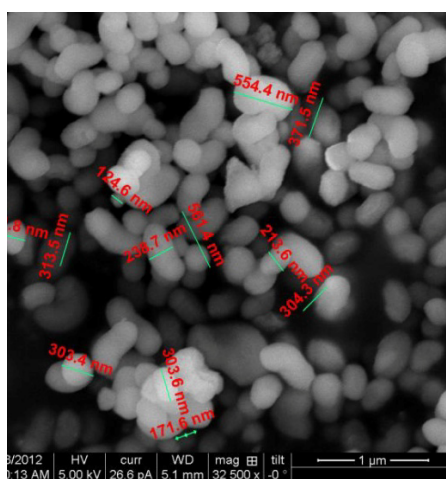

**Fig. S1.** Rod versus spherical particle formation with different Al content

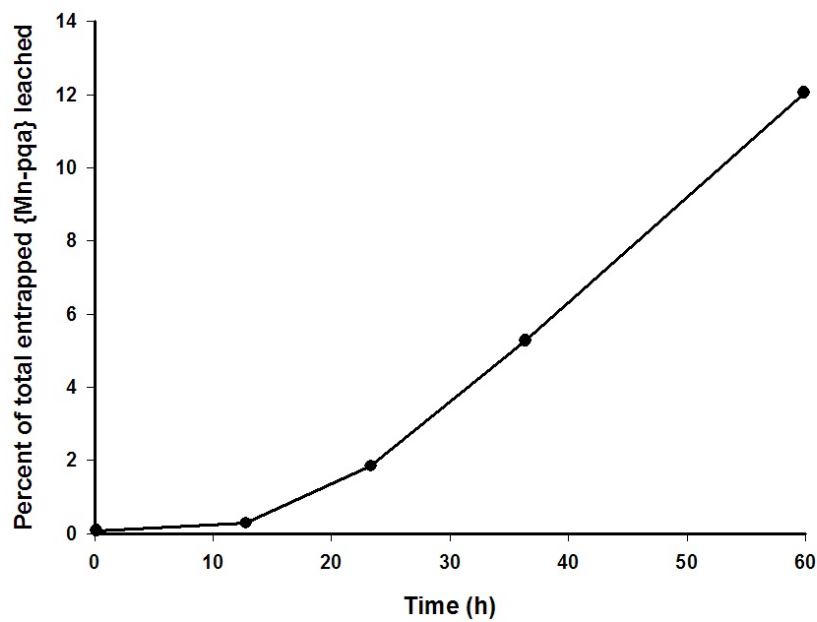

**Fig. S2.** Loss of the carbonyl complex from the {Mn-CO}@Al-MCM-41 particles over a period of 60 h
